# Supplementary material for: Synthesis of embryonic tendon-like tissue by human marrow stromal/mesenchymal stem cells requires a three-dimensional environment and transforming growth factor β3
Source: PubMed Central journal article supplement (PMC3611595; doi:10.1016/j.matbio.2010.08.005), 2010-10

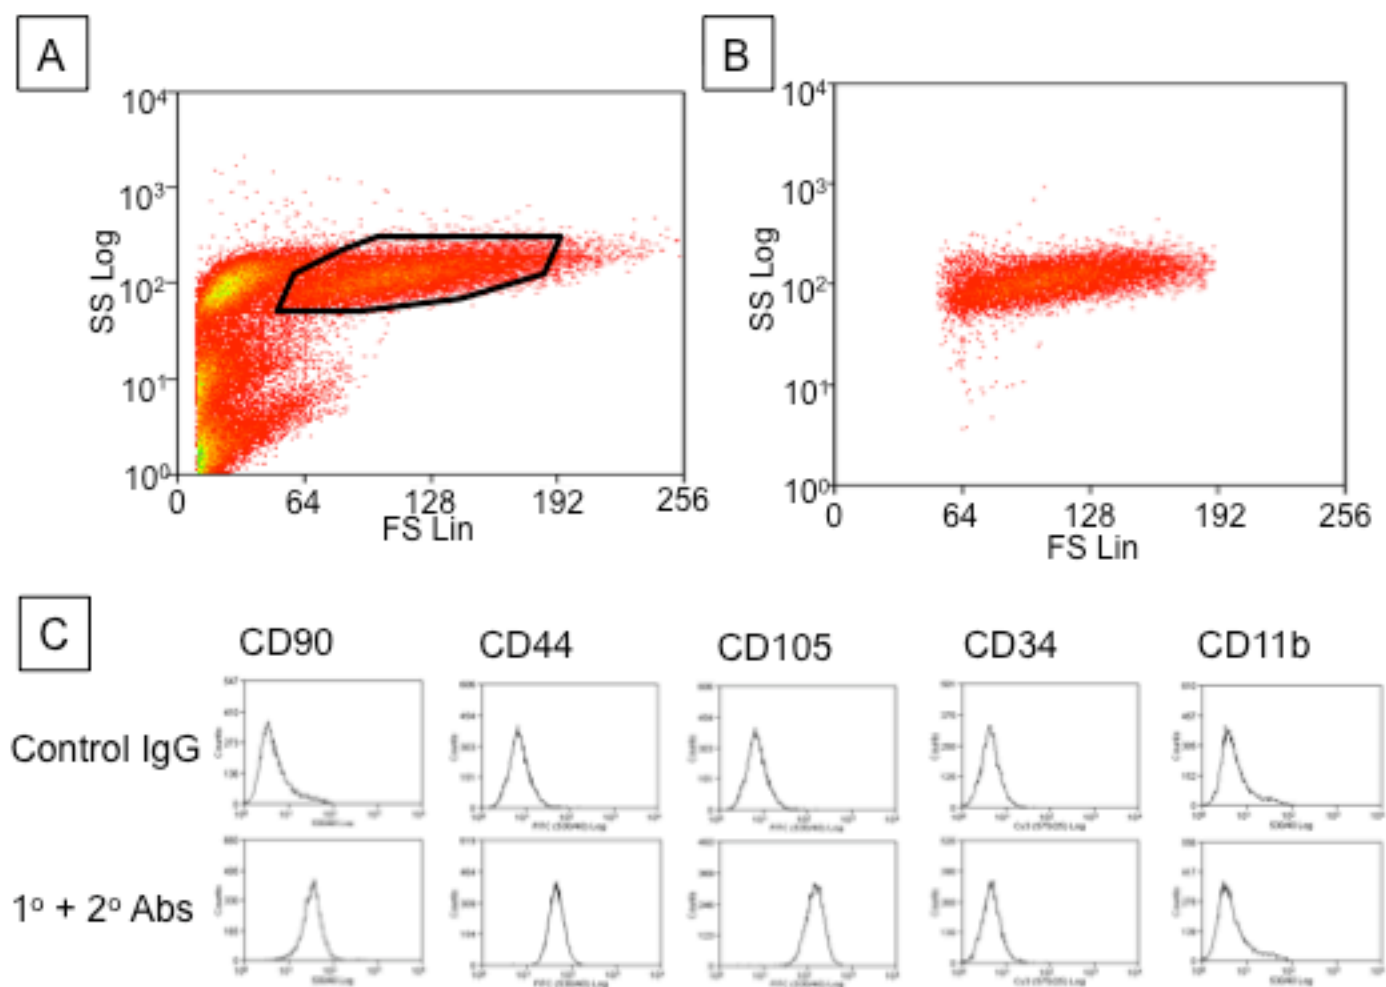

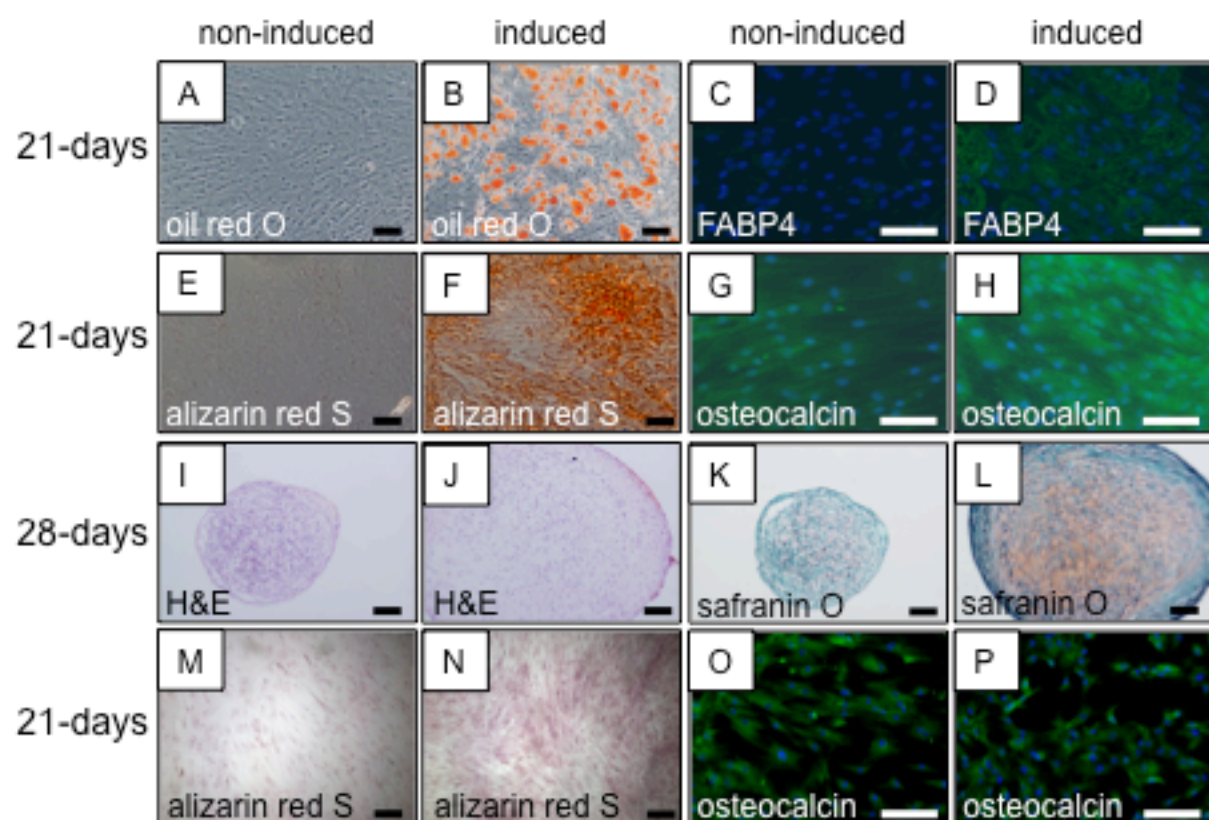

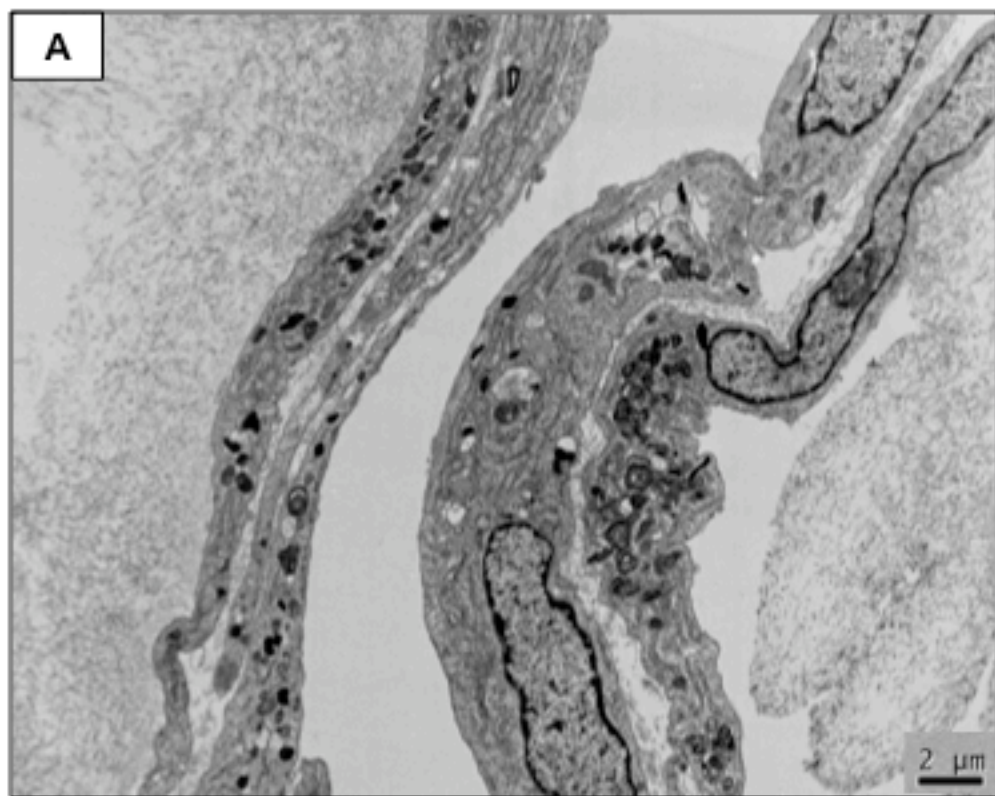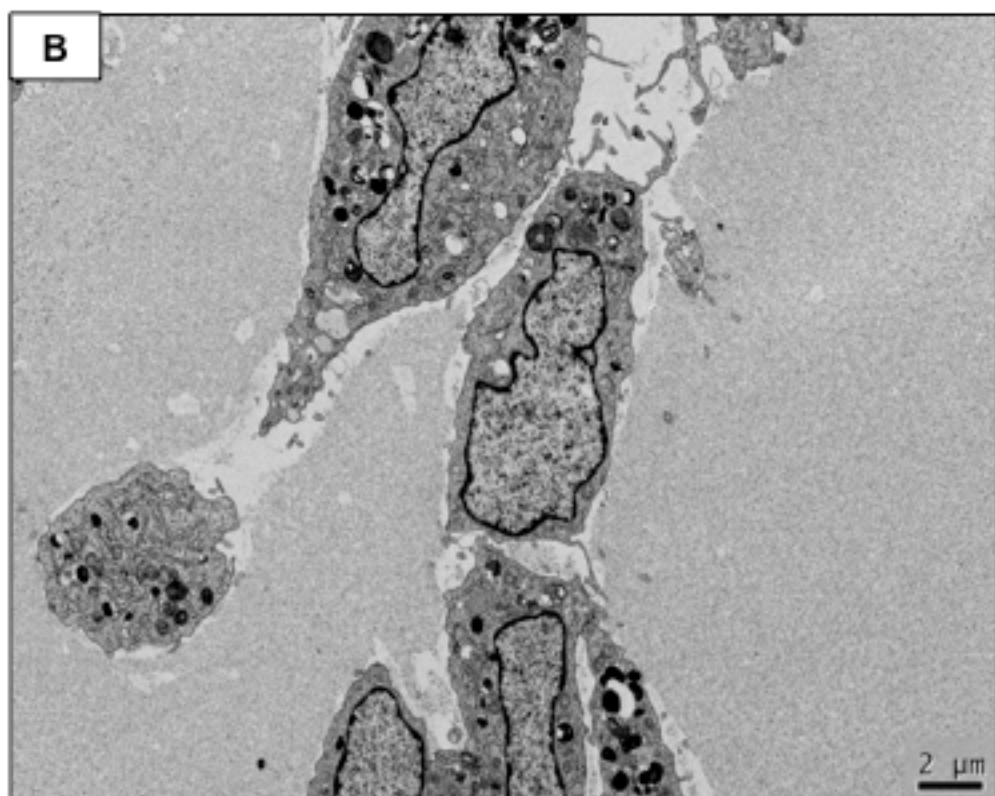

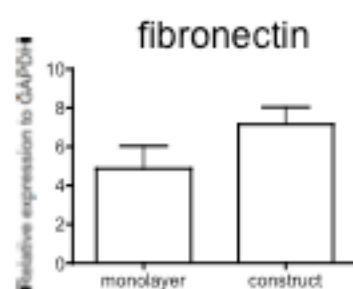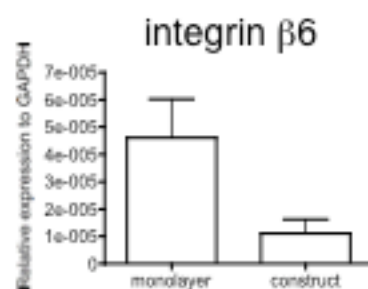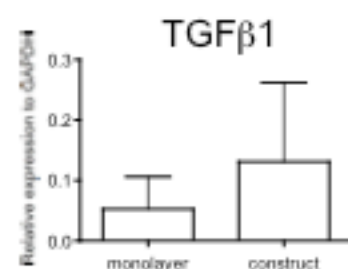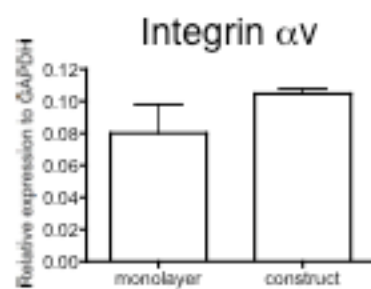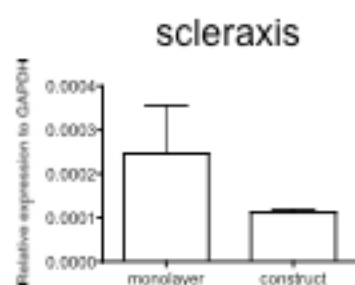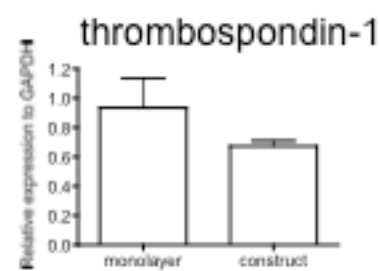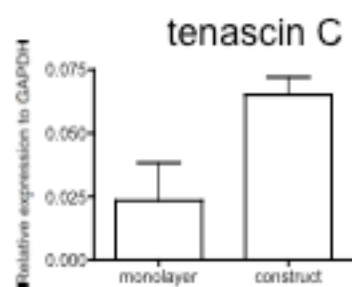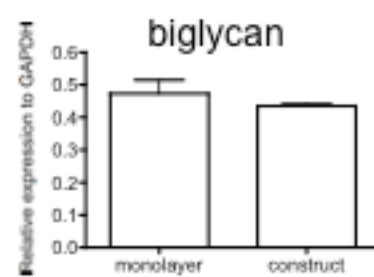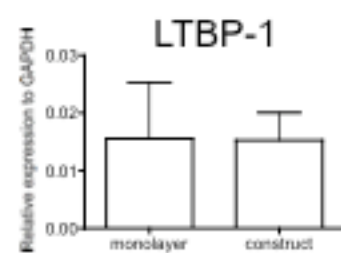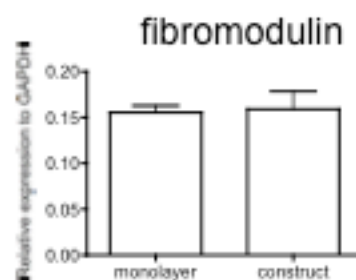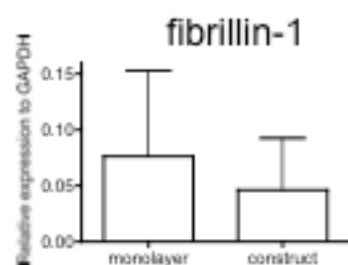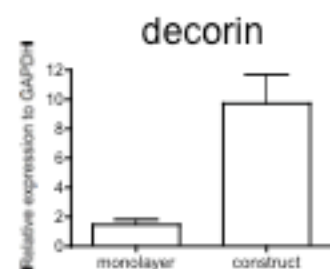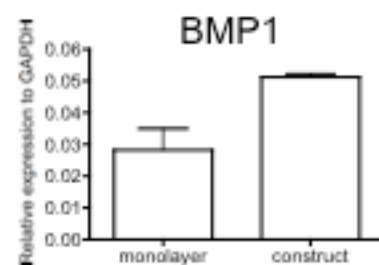

Supplement: mmc1.pdf [file mmc1.pdf]
